# Supplementary material for: A global compilation of in situ aquatic high spectral resolution inherent and apparent optical property data for remote sensing applications
Source: Copernicus journal article supplement (doi:10.5194/essd-2019-105), 2019-07-22
Supplement: Supplementary file [file essd-2019-105-AC2-supplement.pdf]

*We thank Anonymous Referee #2 for the review and constructive feedback on the manuscript. Below we present responses (in regular font italics) to Anonymous Referee #2 comments (in bold).*

**Casey et al. provide a well-documented and clearly organized dataset of IOP/AOP covering a diverse range of oceanic environments. I encourage the publication of this dataset. It will be extremely beneficial as planned satellite missions become a reality.**

**Comments to the authors:**

**1. I suggest paying special attention to your use of “resolution” in the manuscript as it can be misinterpreted in many of its meanings.**

*Thank you for this point. We have thoroughly reviewed the manuscript and paid careful attention to ensure consistent and correct use of the word ‘resolution’. We have changed ‘resolution’ to ‘sampling interval’ where appropriate, as advised by the other reviewer. We have otherwise clarified sentences where appropriate.*

**2. For Figure 4, consider rearranging subplots to transition geographically, or perhaps organize by the range on the y-axis as it would aid the user/reader in comparing the various regions. Additionally, including a subplot of the map similar to Figure 3 on this Figure would also help with clarity.**

*We thank the reviewer for this comment. To improve user readability, we have added labels with the cruise name as well as location to the graphs and supplemented the Figure 4 caption. We have kept the order of the graphs the same to remain consistent with the article text, tables and other figures in the paper. In the caption, we refer readers to the map provided in Figure 3 (matching location with cruise names). We find that adding another map to Figure 4 may be repetitious and detract from space to display the spectral reflectance information.*
